# Supplementary material for: Identification of a 119-bp Promoter of the Maize Sulfite Oxidase Gene (ZmSO) That Confers High-Level Gene Expression and ABA or Drought Inducibility in Transgenic Plants
Source: Int J Mol Sci. 2019 Jul 6;20(13):3326. doi: 10.3390/ijms20133326 (PMC6651508; doi:10.3390/ijms20133326)
Supplement: Supplementary file 1 [file ijms-20-03326-s001.pdf]

## Supplementary Material

**Table S1 Known *cis*-acting elements in the *pZmSO* using the PlantCARE and PLACE databases.**

| <i>Cis</i> -elements | Description                                                               | No |
|----------------------|---------------------------------------------------------------------------|----|
| CAAT-box             | Common <i>cis</i> -acting element                                         | 17 |
| TATA-box             | Core promoter element                                                     | 20 |
| ABRE                 | <i>Cis</i> -acting element involved in the abscisic acid responsiveness   | 3  |
| MBS                  | MYB binding site involved in drought-inducibility                         | 2  |
| TGACG-motif          | <i>Cis</i> -acting regulatory element involved in the MeJA-responsiveness | 2  |
| G-box                | <i>Cis</i> -acting regulatory element involved in light responsiveness    | 2  |
| LTR                  | <i>Cis</i> -acting element involved in low-temperature responsiveness     | 1  |
| TGA-element          | Auxin-responsive element                                                  | 1  |

**Table S2 PCR primers used for 5' RACE-PCR, qPCR, and expression vectors of *ZmSO* promoter and its mutants in transgenic plants in this study.**

| Primer name           | Primer sequence* (5'--3')                                         |
|-----------------------|-------------------------------------------------------------------|
| SOP0-F                | ACGAATTC <sup>u</sup> CCCGTGCTGTGCTGTCTGTCC                       |
| SOP1-F                | ACGAATTC <sup>u</sup> CCAATACAAG GGGTGTGTCAG                      |
| SOP2-F                | ACGAATTC <sup>u</sup> CCTGTACCTGTCTAACCAATGG                      |
| SOP3-F                | AGGAATTC <sup>u</sup> AATTATTCTATATAAAATC                         |
| SOP4-F                | ACGAATTC <sup>u</sup> TCTCGTCTCGTTCTCTTCTCCTCAC                   |
| Mutated SOP2-F1       | TCGAATTC <sup>u</sup> TAGAGAAATTATTCTATATAAAATCCGTA<br>GCTAGATTAG |
| SOP-R                 | ACAAGCTT <sup>u</sup> CTTCGCTAGCCTCCGCGGTGCG                      |
| Outer-specific primer | AATAGCCAAGAACCTCTATCC                                             |
| Inner-specific primer | GGTGAGGCTCAGCATTGAATGG                                            |
| RD29A-QF              | CAGAGGAACCACCACTCAACACA                                           |
| RD29A-QR              | CTCTAGGTTTACCTGTTACGCCTG                                          |
| DREB2A-QF             | CGACTGTTGATTCTCTAT                                                |
| DREB2A-QR             | TTATTCATTCCTGTTGTTAC                                              |
| Actin2-F              | TTGTGCTGGATT CTGGTGATGG                                           |
| Actin2-R              | CCGCTCTGCTGTTGTGGTG                                               |

\*The underlined nucleotides constitute *Eco*RI (GAATTC), or *Hind*III (AAGCTT) restriction enzyme digestion

sites. The nucleotides in bold indicate the mutated MYB binding site (MBS) sequence.

**Fig.S1**

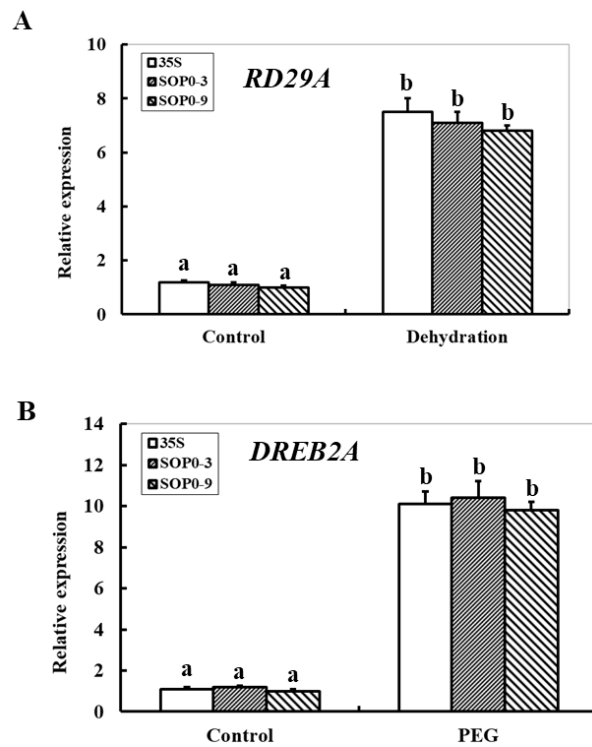

**Figure S1. Expression of stress-induced marker genes in transgenic *Arabidopsis* expressing *ZmSopro:GUS* or *CaMV 35S* in response to dehydration and osmotic stresses.**

Two-week-old seedlings were incubated in the liquid MS medium supplemented with 10 % (w/v) PEG 6000 to realize osmotic stress for 6 h, or the seedlings were transferred onto filter papers to induce dehydration stress for 2 h. The seedlings grown in the liquid MS medium were treated as controls. After treatments, expression of stress-responsive genes *RD29A* (A) and *DREB2A* (B) was assayed by qPCR in seedlings of *CaMV 35S* and two *ZmSopro:GUS* transgenic lines (SOP0-3 and -9). For each experiment, three technical replicates were conducted. Data shown are Mean  $\pm$  SE of three independent experiments. Different lowercase letters above the bars indicate significant differences at  $P < 0.05$ .
